# Supplementary material for: Increased Risk of Dementia in Patients with Atopic Dermatitis: A Nationwide Population-Based Cohort Study
Source: PubMed Central journal article supplement — Acta Derm Venereol. 2023 Apr 27;103:4557. doi: 10.2340/actadv.v103.4557 (PMC10158831; doi:10.2340/actadv.v103.4557), 2023-04-27
Supplement: ActaDV-103-4557-s1.pdf [file ActaDV-103-4557-s1.pdf]

Supplementary material has been published as submitted. It has not been copyedited, typeset or checked for scientific content by Acta Dermato-Venereologica

**Table SI.** Risk of dementia in moderate to severe AD compared with mild AD.

|                            | IR    | HR (95% CI)         |                     |                     |                     |
|----------------------------|-------|---------------------|---------------------|---------------------|---------------------|
|                            |       | Non-adjusted        | Model 1             | Model 2             | Model 3             |
| <i>All cause dementia</i>  |       |                     |                     |                     |                     |
| Mild                       | 7.309 | 1 (Reference)       | 1 (Reference)       | 1 (Reference)       | 1 (Reference)       |
| Moderate to severe         | 6.264 | 0.854 (0.774-0.935) | 0.969 (0.904-1.035) | 0.975 (0.911-1.040) | 0.982 (0.918-1.046) |
| <i>Alzheimer's disease</i> |       |                     |                     |                     |                     |
| Mild                       | 5.571 | 1 (Reference)       | 1 (Reference)       | 1 (Reference)       | 1 (Reference)       |
| Moderate to severe         | 4.999 | 0.895 (0.806-0.984) | 0.983 (0.912-1.055) | 1.020 (0.948-1.091) | 1.026 (0.955-1.097) |
| <i>Vascular dementia</i>   |       |                     |                     |                     |                     |
| Mild                       | 1.032 | 1 (Reference)       | 1 (Reference)       | 1 (Reference)       | 1 (Reference)       |
| Moderate to severe         | 0.752 | 0.728 (0.507-0.949) | 0.818 (0.636-1.000) | 0.833 (0.654-1.013) | 0.844 (0.668-1.019) |

The Cox regression models were used to assess the risks of all-cause dementia, Alzheimer disease, and vascular dementia in patients with atopic dermatitis. Incidence rate is per 1,000 person-years. Model 1 was adjusted for age and gender. Model 2 was adjusted for age, gender, body mass index, smoking, drinking, regular exercise, hypertension, diabetes mellitus, and dyslipidemia. Model 3 was adjusted for age, gender, body mass index, smoking, drinking, regular exercise, hypertension, diabetes mellitus, dyslipidemia, stroke, and ischaemic heart disease. Abbreviations: AD, atopic dermatitis; CI, confidence interval; HR, hazard ratio; IR, incidence rate
